# Supplementary material for: Profiling the Oral Microbiome and Plasma Biochemistry of Obese Hyperglycemic Subjects in Qatar
Source: MDPI journal article supplement (doi:10.3390/microorganisms7120645), 2019-12-03
Supplement: s1 [file s1]

# **Profiling the oral microbiome and plasma biochemistry of obese hyperglycemic subjects in Qatar**

Muhammad U Sohail<sup>1\*</sup>, Mohamed A Elrayess<sup>1</sup>, AA Al Thani<sup>1,2</sup>, M Al-Asmakh<sup>1,2</sup>, Hadi M Yassine<sup>1,2\*</sup>

<sup>1</sup>Biomedical Research Center, Qatar University, 2713, Doha, Qatar

<sup>2</sup>Department of Biomedical Sciences, College of Health Sciences, QU Health, Qatar University, 2713, Doha, Qatar

**Table S1. Data provenance\***

| Parameters                            | Grading                          |                                   |                          |                                                 |                                                                                                    |                                                                                |
|---------------------------------------|----------------------------------|-----------------------------------|--------------------------|-------------------------------------------------|----------------------------------------------------------------------------------------------------|--------------------------------------------------------------------------------|
|                                       | 1                                | 2                                 | 3                        | 4                                               | 5                                                                                                  | 6                                                                              |
| <b>Daily activity</b>                 | Sitting most of the time         | Standing most of the time         | Walking most of the time | Sitting, standing, and walking in equal amounts | Other work with moderate physical activity (includes moving or lifting objects of moderate weight) | Physically heavy work (includes moving or lifting heavy objects or activities) |
| <b>Breast feeding</b>                 | Yes                              | No                                |                          |                                                 |                                                                                                    |                                                                                |
| <b>Weight gain during last 1 year</b> | No, weigh approximately the same | Yes, gained weight                | Yes, lost weight         |                                                 |                                                                                                    |                                                                                |
| <b>Oral Denture</b>                   | Yes                              | No                                |                          |                                                 |                                                                                                    |                                                                                |
| <b>General Health</b>                 | Excellent                        | Good                              | Fair                     | Poor                                            |                                                                                                    |                                                                                |
| <b>Smoking</b>                        | No, have never smoked            | No, just have tried once or twice | No, stopped smoking      | Yes, only occasionally                          | Yes, on most or all days                                                                           |                                                                                |
| <b>Fast food</b>                      | Never or rarely                  | 1-3 times per month               | 1-3 times per week       | 4-6 times a week                                | Once per day                                                                                       | 2 or more times per day                                                        |
| <b>Processed Cheese</b>               | Never or rarely                  | 1-3 times per month               | 1-3 times per week       | 4-6 times a week                                | Once per day                                                                                       | 2 or more times per day                                                        |
| <b>Hard cheese</b>                    | Never or rarely                  | 1-3 times per month               | 1-3 times per week       | 4-6 times a week                                | Once per day                                                                                       | 2 or more times per day                                                        |
| <b>Butter</b>                         | Never or rarely                  | 1-3 times per month               | 1-3 times per week       | 4-6 times a week                                | Once per day                                                                                       | 2 or more times per day                                                        |

| <b>Milk type</b>                             | Whole fat milk  | Reduced fat milk    | Fat free milk      | All types of milk equally | Other; eg Soya, almond etc | I don't know            |
|----------------------------------------------|-----------------|---------------------|--------------------|---------------------------|----------------------------|-------------------------|
| <b>Meat shawarma</b>                         | Never or rarely | 1-3 times per month | 1-3 times per week | 4-6 times a week          | Once per day               | 2 or more times per day |
| <b>Chicken shawarma</b>                      | Never or rarely | 1-3 times per month | 1-3 times per week | 4-6 times a week          | Once per day               | 2 or more times per day |
| <b>Falafel wrap</b>                          | Never or rarely | 1-3 times per month | 1-3 times per week | 4-6 times a week          | Once per day               | 2 or more times per day |
| <b>Samosa</b>                                | Never or rarely | 1-3 times per month | 1-3 times per week | 4-6 times a week          | Once per day               | 2 or more times per day |
| <b>Other middle-eastern style fast foods</b> | Never or rarely | 1-3 times per month | 1-3 times per week | 4-6 times a week          | Once per day               | 2 or more times per day |
| <b>French fries</b>                          | Never or rarely | 1-3 times per month | 1-3 times per week | 4-6 times a week          | Once per day               | 2 or more times per day |
| <b>Potato chips</b>                          | Never or rarely | 1-3 times per month | 1-3 times per week | 4-6 times a week          | Once per day               | 2 or more times per day |
| <b>Burgers, hotdogs</b>                      | Never or rarely | 1-3 times per month | 1-3 times per week | 4-6 times a week          | Once per day               | 2 or more times per day |
| <b>Pizza</b>                                 | Never or rarely | 1-3 times per month | 1-3 times per week | 4-6 times a week          | Once per day               | 2 or more times per day |
| <b>Fried chicken, e.g. wings, nuggets</b>    | Never or rarely | 1-3 times per month | 1-3 times per week | 4-6 times a week          | Once per day               | 2 or more times per day |

\*The demographic data was collected as per Qatar Biobank designed questionnaire. For statistical analysis the data were categorically arranged from 1 to 6 where 1 is lowest or negative value while 6 is highest possible value.

**Table S2. Dietary habits of the study population. Consumption of dairy products**

| Group Statistics |         |    |      |                |         |
|------------------|---------|----|------|----------------|---------|
|                  | group   | N  | Mean | Std. Deviation | P-Value |
| Milk             | Obese   | 35 | 3.03 | 1.65           | 0.3     |
|                  | Control | 32 | 2.53 | 1.34           |         |
| Milk Cereals     | Obese   | 35 | 2.11 | 1.47           | 0.1     |
|                  | Control | 35 | 1.57 | 0.78           |         |
| Flavored milk    | Obese   | 36 | 1.78 | 1.12           | 0.7     |
|                  | Control | 34 | 1.59 | 0.92           |         |
| Laban            | Obese   | 32 | 2.69 | 1.18           | 0.27    |
|                  | Control | 34 | 2.65 | 1.28           |         |
| Yoghurt          | Obese   | 28 | 2.54 | 1.20           | 0.33    |
|                  | Control | 31 | 2.71 | 1.42           |         |
| Labneh           | Obese   | 36 | 2.33 | 0.89           | 0.32    |
|                  | Control | 35 | 1.97 | 1.01           |         |
| Cheese           | Obese   | 33 | 2.24 | 0.87           |         |
|                  | Control | 32 | 2.13 | 1.24           | 0.06    |
| Processed cheese | Obese   | 36 | 1.72 | 1.00           |         |
|                  | Control | 36 | 1.86 | 1.25           | 0.34    |
| Hard chees       | Obese   | 36 | 2.00 | 0.99           |         |
|                  | Control | 35 | 1.71 | 0.79           | 0.84    |
| Butter           | Obese   | 36 | 1.67 | 0.86           |         |
|                  | Control | 36 | 1.86 | 1.20           | 0.17    |

**Table S3. Dietary habits of the study population. Consumption of fast food**

| Group Statistics                   |         |    |      |                |         |
|------------------------------------|---------|----|------|----------------|---------|
|                                    | group   | N  | Mean | Std. Deviation | P-Value |
| Meat shawarma                      | Obese   | 36 | 2.03 | 0.88           | 0.72    |
|                                    | Control | 36 | 1.67 | 0.63           |         |
| Chicken shawarma                   | Obese   | 36 | 2.31 | 0.82           | 0.82    |
|                                    | Control | 36 | 1.83 | 0.81           |         |
| Falafel wrap                       | Obese   | 36 | 1.92 | 0.69           | 0.2     |
|                                    | Control | 36 | 1.67 | 0.72           |         |
| Samosa                             | Obese   | 36 | 1.69 | 0.62           | 0.52    |
|                                    | Control | 36 | 1.58 | 0.65           |         |
| Other Middle East style fast foods | Obese   | 36 | 1.75 | 0.77           | 0.47    |
|                                    | Control | 36 | 1.64 | 0.93           |         |
| French fries                       | Obese   | 36 | 2.25 | 0.94           | 0.56    |
|                                    | Control | 36 | 2.11 | 0.95           |         |
| Potato chips                       | Obese   | 36 | 2.25 | 1.00           | 0.73    |
|                                    | Control | 36 | 1.92 | 0.97           |         |
| Burgers hotdogs                    | Obese   | 36 | 2.33 | 0.93           | 0.61    |
|                                    | Control | 36 | 1.97 | 1.03           |         |
| Pizza                              | Obese   | 36 | 2.22 | 0.87           | 0.47    |
|                                    | Control | 36 | 2.06 | 0.89           |         |
| Fried chicken                      | Obese   | 36 | 2.22 | 0.90           | 0.3     |
|                                    | Control | 36 | 1.89 | 1.09           |         |

**Table S4. Oral health of the participants**

| Oral Health          | *No of participants responded | No of positive cases |         | Chi-square P value |
|----------------------|-------------------------------|----------------------|---------|--------------------|
|                      |                               | Obese                | Control |                    |
| Mouth ulcers         | 43                            | 1                    | 2       | 0.79               |
| Painful gums         | 42                            | 0                    | 2       | 0.91               |
| Bleeding gums        | 47                            | 4                    | 3       | 8.80E-20           |
| Loose teeth          | 43                            | 2                    | 1       | 7.74E-20           |
| Toothache            | 62                            | 12                   | 10      | 8.06E-20           |
| Oral denture implant | 73                            | 9                    | 10      | 0.73               |

\*Number of the participants responded yes or no to the oral health questionnaire. Chi-square test was applied on the oral health positive cases only.

**Table S5. List of instruments and reagent kits used for serum biochemistry analysis**

| #  | Test Name                   | Instrument Name     | Reagent Kit used                                      |
|----|-----------------------------|---------------------|-------------------------------------------------------|
| 1  | ALT ( GPT )                 | HG Architect C 8000 | ALTL, 20764957 322, Cobas, Roche                      |
| 2  | AST (GOT)                   | ON RR Cobas 6000    | ASTL, 20764949 322, Cobas, Roche                      |
| 3  | Alkaline Phosphatase        | HG Architect C 8000 | ALP, 10816388 216, Cobas Roche                        |
| 4  | C-Peptide                   | HG Architect i20    | Elecsys C-Peptide, 03184897 190, Cobas, Roche         |
| 5  | Cholesterol Total           | ON RR Cobas 6000    | cobas Lipid Panel, 06380115119, Cobas, Roche          |
| 6  | Creatinine                  | HG Architect C 8000 | CREP2, 05401470 190, Cobas, Roche                     |
| 7  | Estradiol                   | AW Unicel DxI 60    | Elecsys Estradiol III kit, 06656021 119, Cobas, Roche |
| 8  | Free Thyroxine              | COBAS 801           | Elecsys FT4 III, 07976836 190, Cobas, Roche           |
| 9  | Free Triiodothyronine       | HG Architect i20    | FT3 III, 06437206 190, Cobas, Roche                   |
| 10 | Glucose                     | HG Architect C 8000 | GLUC3, 05168791 190, Cobas, Roche                     |
| 11 | HDL-Cholesterol             | ON RR Cobas 6000    | Cobas Lipid Panel, 06380115119, Cobas, Roche          |
| 12 | Homocysteine                | HG Architect i20    | Homocysteine, 1L71/ABRL004/R4, Architect, Abbott      |
| 13 | Insulin                     | HG Architect i20    | Elecsys Insulin kit, 12017547 122, Cobas, Roche       |
| 14 | LDL-Cholesterol Calc        | ON RR Cobas 6000    | Cobas Lipid Panel, 06380115119, Cobas, Roche          |
| 15 | SexHormone Binding Globulin | HG Architect i20    | Elecsys SHBG kit, Cobas, Roche                        |
| 16 | Testosterone Total          | HG Architect i20    | Elecsys Testosterone II, 05200067 190, Cobas, Roche   |
| 17 | Thyroid Stimulating Hormone | COBAS 801           | Elecsys FT3 III, 06437206 190, Cobas                  |
| 18 | Triglyceride                | ON RR Cobas 6000    | cobas Lipid Panel, 06380115119, Cobas, Roche          |

Complete list of instruments used at Hamad Medical Cooperation Diagnostic Laboratory for analysis of the plasma biochemistry.
